# Supplementary material for: Niche differentiation drives microbial community assembly and succession in full-scale activated sludge bioreactors
Source: PubMed Central journal article supplement (PMC9001656; doi:10.1038/s41522-022-00291-2), 2022-04-11
Supplement: 41522_2022_291_MOESM1_ESM.pdf [file 41522_2022_291_MOESM1_ESM.pdf]

**SUPPLEMENTARY TABLE 1.** Nodes significantly correlated (FDR < 0.05) to a pollutant degradation rate (BOD: biological oxygen demand; TN: total nitrogen; TP: total phosphorous). On each pollutant column is indicated the significant Spearman's rank correlation between the node abundance and the degradation rate.

| WWTP    | Community | Main Pollutant | BOD_R   | TN_R    | TP_R | Genus (MiDaS)   |
|---------|-----------|----------------|---------|---------|------|-----------------|
| FF-WWTP | 2         | BOD_R-         | -0.5168 |         |      | Unidentified    |
| FF-WWTP | 2         | BOD_R-         | -0.4415 |         |      | Blastopirellula |
| FF-WWTP | 2         | BOD_R-         | -0.4110 |         |      | Unidentified    |
| FF-WWTP | 1         | BOD_R+         | 0.4145  |         |      | Unidentified    |
| FF-WWTP | 1         | BOD_R+         | 0.4147  |         |      | Unidentified    |
| FF-WWTP | 1         | BOD_R+         | 0.4184  |         |      | Byssovorax      |
| FF-WWTP | 1         | BOD_R+         | 0.4211  |         |      | Pir4_lineage    |
| FF-WWTP | 1         | BOD_R+         | 0.4233  |         |      | Unidentified    |
| FF-WWTP | 1         | BOD_R+         | 0.4243  |         |      | Unidentified    |
| FF-WWTP | 1         | BOD_R+         | 0.4273  |         |      | Unidentified    |
| FF-WWTP | 1         | BOD_R+         | 0.4283  |         |      | Unidentified    |
| FF-WWTP | 1         | BOD_R+         | 0.4338  |         |      | Unidentified    |
| FF-WWTP | 1         | BOD_R+         | 0.4433  |         |      | Halomonas       |
| FF-WWTP | 1         | BOD_R+         | 0.4450  |         |      | Unidentified    |
| FF-WWTP | 1         | BOD_R+         | 0.4455  |         |      | Unidentified    |
| FF-WWTP | 1         | BOD_R+         |         |         |      | Pirellula       |
| FF-WWTP | 1         | BOD_R+         | 0.4480  |         |      | Unidentified    |
| FF-WWTP | 1         | BOD_R+         | 0.4514  |         |      | Unidentified    |
| FF-WWTP | 1         | BOD_R+         | 0.4665  |         |      | Unidentified    |
| FF-WWTP | 1         | BOD_R+         | 0.4783  |         |      | JGI_0001001-H03 |
| FF-WWTP | 1         | BOD_R+         | 0.4847  |         |      | Unidentified    |
| FF-WWTP | 1         | BOD_R+         | 0.5058  |         |      | Acinetobacter   |
| FF-WWTP | 1         | BOD_R+         | 0.5204  |         |      | Unidentified    |
| FF-WWTP | 1         | BOD_R+         | 0.5303  |         |      | Unidentified    |
| FF-WWTP | 1         | BOD_R+         | 0.5682  |         |      | Alkanindiges    |
| FF-WWTP | 2         | TN_R-          |         | -0.5645 |      | Unidentified    |
| FF-WWTP | 2         | TN_R-          |         | -0.5494 |      | Unidentified    |
| FF-WWTP | 2         | TN_R-          |         | -0.5373 |      | Unidentified    |
| FF-WWTP | 2         | TN_R-          |         | -0.4911 |      | Flavobacterium  |
| FF-WWTP | 2         | TN_R-          |         | -0.4903 |      | Pedomicrobium   |
| FF-WWTP | 2         | TN_R-          |         | -0.4900 |      | Unidentified    |
| FF-WWTP | 1         | TN_R-          |         | -0.4846 |      | Unidentified    |
| FF-WWTP | 2         | TN_R-          |         | -0.4833 |      | Mesorhizobium   |
| FF-WWTP | 2         | TN_R-          |         | -0.4823 |      | Unidentified    |
| FF-WWTP | 2         | TN_R-          |         | -0.4813 |      | Unidentified    |
| FF-WWTP | 2         | TN_R-          |         | -0.4730 |      | Runella         |
| FF-WWTP | 2         | TN_R-          |         | -0.4658 |      | Unidentified    |
| FF-WWTP | 2         | TN_R-          |         | -0.4652 |      | Unidentified    |
| FF-WWTP | 2         | TN_R-          |         | -0.4580 |      | Pirellula       |
| FF-WWTP | 2         | TN_R-          |         | -0.4506 |      | DMER64          |

|         |   |       |         |                        |
|---------|---|-------|---------|------------------------|
| FF-WWTP | 2 | TN_R- | -0.4473 | Unidentified           |
| FF-WWTP | 2 | TN_R- | -0.4468 | SH3-11                 |
| FF-WWTP | 2 | TN_R- | -0.4377 | Ca_Microthrix          |
| FF-WWTP | 2 | TN_R- | -0.4327 | Unidentified           |
|         |   |       |         | Christensenellaceae_R- |
| FF-WWTP | 2 | TN_R- | -0.4317 | 7_group                |
| FF-WWTP | 2 | TN_R- | -0.4235 | Unidentified           |
| FF-WWTP | 2 | TN_R- | -0.4189 | BD1-7_clade            |
| FF-WWTP | 2 | TN_R- | -0.4170 | Unidentified           |
| FF-WWTP | 2 | TN_R- | -0.4157 | Unidentified           |
| FF-WWTP | 2 | TN_R- | -0.4148 | Ca_Sarcinithrix        |
| FF-WWTP | 2 | TN_R- | -0.4133 | Unidentified           |
| FF-WWTP | 2 | TN_R- | -0.4085 | Unidentified           |
| FF-WWTP | 2 | TN_R- | -0.4013 | Unidentified           |
| FF-WWTP | 2 | TN_R- | -0.3958 | Unidentified           |
| FF-WWTP | 2 | TN_R- | -0.3955 | Unidentified           |
| FF-WWTP | 2 | TN_R- | -0.3889 | Sphingorhabdus         |
| FF-WWTP | 2 | TN_R- | -0.3884 | Unidentified           |
| FF-WWTP | 2 | TN_R- | -0.3884 | Paracoccus             |
| FF-WWTP | 2 | TN_R- | -0.3859 | SH-PL14                |
| FF-WWTP | 2 | TN_R- | -0.3845 | Cytophaga              |
| FF-WWTP | 2 | TN_R- | -0.3844 | Unidentified           |
| FF-WWTP | 2 | TN_R- | -0.3799 | Unidentified           |
| FF-WWTP | 2 | TN_R- | -0.3768 | Unidentified           |
| FF-WWTP | 2 | TN_R- | -0.3754 | Unidentified           |
| FF-WWTP | 2 | TN_R- | -0.3734 | CL500-29_marine_group  |
| FF-WWTP | 2 | TN_R- | -0.3730 | Unidentified           |
| FF-WWTP | 2 | TN_R- | -0.3717 | Unidentified           |
| FF-WWTP | 2 | TN_R- | -0.3701 | Unidentified           |
| FF-WWTP | 2 | TN_R- | -0.3667 | Unidentified           |
| FF-WWTP | 2 | TN_R- | -0.3666 | Unidentified           |
| FF-WWTP | 1 | TN_R- | -0.3664 | Unidentified           |
| FF-WWTP | 2 | TN_R- | -0.3660 | SM1A02                 |
| FF-WWTP | 1 | TN_R- | -0.3648 | Terrimonas             |
| FF-WWTP | 1 | TN_R+ | 0.3693  | Oikopleura             |
| FF-WWTP | 1 | TN_R+ | 0.3708  | Unidentified           |
| FF-WWTP | 1 | TN_R+ | 0.3788  | Ellin6067              |
| FF-WWTP | 1 | TN_R+ | 0.3790  | Unidentified           |
| FF-WWTP | 1 | TN_R+ | 0.3793  | Chitinivorax           |
| FF-WWTP | 1 | TN_R+ | 0.3827  | Unidentified           |
| FF-WWTP | 1 | TN_R+ | 0.3872  | Unidentified           |
| FF-WWTP | 1 | TN_R+ | 0.3877  | Unidentified           |
| FF-WWTP | 1 | TN_R+ | 0.3891  | Unidentified           |
| FF-WWTP | 2 | TN_R+ | 0.3920  | Unidentified           |
| FF-WWTP | 1 | TN_R+ | 0.4005  | Unidentified           |
| FF-WWTP | 1 | TN_R+ | 0.4022  | Unidentified           |

|         |   |        |         |         |                            |
|---------|---|--------|---------|---------|----------------------------|
| FF-WWTP | 2 | TN_R+  | 0.4064  |         | Unidentified               |
| FF-WWTP | 1 | TN_R+  | 0.4074  |         | Unidentified               |
| FF-WWTP | 1 | TN_R+  | 0.4089  |         | Unidentified               |
| FF-WWTP | 1 | TN_R+  | 0.4129  |         | Unidentified               |
| FF-WWTP | 2 | TN_R+  | 0.4190  |         | Oikopleura                 |
| FF-WWTP | 1 | TN_R+  | 0.4264  |         | Unidentified               |
| FF-WWTP | 1 | TN_R+  | 0.4306  |         | Ellin6067                  |
| FF-WWTP | 1 | TN_R+  | 0.4316  |         | Subgroup_10                |
| FF-WWTP | 1 | TN_R+  | 0.4333  |         | Unidentified               |
| FF-WWTP | 1 | TN_R+  | 0.4441  |         | Unidentified               |
| FF-WWTP | 1 | TN_R+  | 0.4479  |         | Unidentified               |
| FF-WWTP | 1 | TN_R+  | 0.4482  |         | Unidentified               |
| FF-WWTP | 1 | TN_R+  | 0.4569  |         | Unidentified               |
| FF-WWTP | 1 | TN_R+  | 0.4804  |         | Unidentified               |
| FF-WWTP | 1 | TN_R+  | 0.4888  |         | Phaeodactylibacter         |
| FF-WWTP | 1 | TN_R+  | 0.4962  |         | Unidentified               |
| FF-WWTP | 1 | TN_R+  | 0.5318  |         | Dechloromonas              |
| FF-WWTP | 1 | TN_R+  | 0.5357  |         | Fluviicoccus               |
| FF-WWTP | 1 | TN_R+  | 0.5759  |         | Agitococcus_lubricus_group |
| FF-WWTP | 2 | TP_R-  | -0.5122 |         | Unidentified               |
| FF-WWTP | 1 | TP_R-  | -0.5009 |         | Rhodopirellula             |
| SU-WWTP | 3 | TP_R-  | -0.6014 | -0.7529 | Unidentified               |
| SU-WWTP | 3 | TP_R-  | -0.3531 | -0.6588 | Fimbriiglobus              |
| SU-WWTP | 3 | TP_R-  | -0.6252 | -0.6553 | Unidentified               |
| SU-WWTP | 3 | TP_R-  | -0.3792 | -0.6373 | Unidentified               |
| SU-WWTP | 3 | TP_R-  | -0.4747 | -0.6252 | Unidentified               |
| SU-WWTP | 3 | TP_R-  | -0.6112 | -0.6252 | Unidentified               |
| SU-WWTP | 2 | BOD R- | -0.6110 |         | Unidentified               |
| SU-WWTP | 3 | TP_R-  | -0.5799 | -0.6063 | Unidentified               |
| SU-WWTP | 3 | TP_R-  | -0.3985 | -0.6004 | Ferruginibacter            |
| SU-WWTP | 3 | TP_R-  | -0.5720 | -0.5975 | Unidentified               |
| SU-WWTP | 3 | TP_R-  | -0.5402 | -0.5956 | Unidentified               |
| SU-WWTP | 3 | TN_R-  | -0.5950 | -0.4608 | Unidentified               |
| SU-WWTP | 3 | TN_R-  | -0.5943 | -0.4950 | Unidentified               |
| SU-WWTP | 3 | TP_R-  | -0.3385 | -0.5865 | Nannocystis                |
| SU-WWTP | 3 | TP_R-  |         | -0.5834 | Terrimonas                 |
| SU-WWTP | 3 | TP_R-  |         | -0.5818 | Unidentified               |
| SU-WWTP | 3 | TP_R-  | -0.3954 | -0.5801 | Gordonia                   |
| SU-WWTP | 3 | TP_R-  | -0.3280 | -0.5792 | Unidentified               |
| SU-WWTP | 3 | TP_R-  | -0.5413 | -0.5769 | Lewinella                  |
| SU-WWTP | 3 | TP_R-  | -0.5475 | -0.5759 | Unidentified               |
| SU-WWTP | 3 | TN_R-  | -0.5755 | -0.5499 | Ca_Berkiella               |
| SU-WWTP | 3 | TP_R-  | -0.4760 | -0.5740 | Unidentified               |
| SU-WWTP | 3 | TP_R-  | -0.4425 | -0.5733 | Fimbriiglobus              |
| SU-WWTP | 3 | TP_R-  | -0.3869 | -0.5723 | Unidentified               |
| SU-WWTP | 3 | TP_R-  |         | -0.5691 | Terrimonas                 |

|         |   |       |         |         |                 |
|---------|---|-------|---------|---------|-----------------|
| SU-WWTP | 3 | TP_R- | -0.4800 | -0.5667 | Unidentified    |
| SU-WWTP | 3 | TP_R- | -0.5532 | -0.5661 | Flavobacterium  |
| SU-WWTP | 3 | TP_R- | -0.4703 | -0.5621 | Kouleothrix     |
| SU-WWTP | 3 | TN_R- | -0.5554 | -0.3874 | Unidentified    |
| SU-WWTP | 3 | TN_R- | -0.5535 | -0.4825 | Unidentified    |
| SU-WWTP | 3 | TN_R- | -0.5528 | -0.5290 | Pirellula       |
| SU-WWTP | 3 | TP_R- | -0.4714 | -0.5483 | Unidentified    |
| SU-WWTP | 3 | TP_R- | -0.5291 | -0.5464 | Unidentified    |
| SU-WWTP | 3 | TP_R- | -0.4612 | -0.5457 | Ellin6067       |
| SU-WWTP | 3 | TN_R- | -0.5443 | -0.5441 | Unidentified    |
| SU-WWTP | 3 | TP_R- | -0.4109 | -0.5431 | Unidentified    |
| SU-WWTP | 3 | TP_R- | -0.5321 | -0.5407 | Unidentified    |
| SU-WWTP | 3 | TP_R- | -0.3925 | -0.5360 | Unidentified    |
| SU-WWTP | 3 | TN_R- | -0.5352 | -0.4999 | Unidentified    |
| SU-WWTP | 3 | TN_R- | -0.5350 | -0.3782 | Unidentified    |
| SU-WWTP | 3 | TP_R- | -0.4136 | -0.5339 | Unidentified    |
| SU-WWTP | 3 | TP_R- | -0.5132 | -0.5335 | Unidentified    |
| SU-WWTP | 3 | TN_R- | -0.5332 | -0.5060 | Unidentified    |
| SU-WWTP | 3 | TP_R- | -0.5071 | -0.5324 | Unidentified    |
| SU-WWTP | 3 | TP_R- | -0.5305 | -0.5320 | Unidentified    |
| SU-WWTP | 3 | TP_R- | -0.4880 | -0.5297 | Rhodobacter     |
| SU-WWTP | 3 | TN_R- | -0.5279 | -0.4863 | Unidentified    |
| SU-WWTP | 3 | TP_R- | -0.4029 | -0.5263 | Unidentified    |
| SU-WWTP | 3 | TP_R- | -0.4485 | -0.5261 | Unidentified    |
| SU-WWTP | 3 | TP_R- | -0.3377 | -0.5251 | Unidentified    |
| SU-WWTP | 3 | TP_R- | -0.4586 | -0.5208 | Unidentified    |
| SU-WWTP | 3 | TP_R- | -0.4701 | -0.5198 | Ellin6067       |
| SU-WWTP | 3 | TP_R- | -0.4078 | -0.5196 | Nitrospira      |
| SU-WWTP | 3 | TN_R- | -0.5174 | -0.3210 | Unidentified    |
| SU-WWTP | 3 | TN_R- | -0.5165 | -0.5029 | Unidentified    |
| SU-WWTP | 3 | TP_R- | -0.4775 | -0.5155 | Unidentified    |
| SU-WWTP | 3 | TP_R- |         | -0.5154 | Unidentified    |
| SU-WWTP | 3 | TP_R- | -0.4999 | -0.5143 | Kouleothrix     |
| SU-WWTP | 3 | TP_R- |         | -0.5129 | Unidentified    |
| SU-WWTP | 3 | TN_R- | -0.5117 | -0.4347 | Unidentified    |
| SU-WWTP | 3 | TP_R- | -0.4381 | -0.5109 | Turneriella     |
| SU-WWTP | 3 | TP_R- | -0.3979 | -0.5105 | Unidentified    |
| SU-WWTP | 3 | TN_R- | -0.5079 | -0.4533 | Unidentified    |
| SU-WWTP | 3 | TP_R- | -0.4826 | -0.5065 | Ca_Sarcinithrix |
| SU-WWTP | 3 | TN_R- | -0.5052 | -0.3726 | Unidentified    |
| SU-WWTP | 3 | TP_R- | -0.4276 | -0.5052 | Novosphingobium |
| SU-WWTP | 3 | TP_R- | -0.3369 | -0.5045 | Hirschia        |
| SU-WWTP | 3 | TP_R- | -0.3962 | -0.5039 | Unidentified    |
| SU-WWTP | 3 | TN_R- | -0.5033 | -0.3509 | Unidentified    |
| SU-WWTP | 3 | TN_R- | -0.5028 | -0.4703 | Ferruginibacter |
| SU-WWTP | 3 | TN_R- | -0.5027 | -0.3923 | Unidentified    |

|         |   |       |         |         |                      |
|---------|---|-------|---------|---------|----------------------|
| SU-WWTP | 3 | TP_R- | -0.3543 | -0.5011 | Runella              |
| SU-WWTP | 3 | TP_R- | -0.4919 | -0.5010 | Unidentified         |
| SU-WWTP | 3 | TP_R- | -0.4677 | -0.4969 | Unidentified         |
| SU-WWTP | 3 | TP_R- | -0.3928 | -0.4958 | Fimbrioglobus        |
| SU-WWTP | 3 | TP_R- | -0.3783 | -0.4956 | Unidentified         |
| SU-WWTP | 3 | TP_R- | -0.3907 | -0.4952 | Unidentified         |
| SU-WWTP | 3 | TP_R- | -0.4385 | -0.4948 | Unidentified         |
| SU-WWTP | 3 | TP_R- |         | -0.4947 | Terrimonas           |
| SU-WWTP | 3 | TP_R- | -0.3898 | -0.4941 | Unidentified         |
| SU-WWTP | 3 | TP_R- |         | -0.4937 | Unidentified         |
| SU-WWTP | 3 | TP_R- | -0.4657 | -0.4927 | Unidentified         |
| SU-WWTP | 3 | TN_R- | -0.4909 | -0.3169 | Subgroup_10          |
| SU-WWTP | 3 | TP_R- | -0.4415 | -0.4907 | Unidentified         |
| SU-WWTP | 3 | TP_R- | -0.4733 | -0.4906 | Unidentified         |
| SU-WWTP | 3 | TN_R- | -0.4906 | -0.3504 | Dechloromonas        |
| SU-WWTP | 3 | TP_R- | -0.3925 | -0.4899 | Unidentified         |
| SU-WWTP | 3 | TP_R- | -0.4271 | -0.4879 | Unidentified         |
| SU-WWTP | 3 | TP_R- | -0.4632 | -0.4877 | Ca_Promineofilum     |
| SU-WWTP | 3 | TN_R- | -0.4855 | -0.4808 | Unidentified         |
| SU-WWTP | 3 | TP_R- |         | -0.4844 | Haliangium           |
| SU-WWTP | 3 | TN_R- | -0.4821 |         | Crenothrix           |
| SU-WWTP | 2 | TN_R- | -0.4820 |         | Unidentified         |
| SU-WWTP | 3 | TN_R- | -0.4816 | -0.3557 | Unidentified         |
| SU-WWTP | 3 | TP_R- | -0.3240 | -0.4811 | Unidentified         |
| SU-WWTP | 3 | TN_R- | -0.4795 | -0.4524 | Unidentified         |
| SU-WWTP | 3 | TP_R- | -0.4239 | -0.4772 | Unidentified         |
| SU-WWTP | 3 | TP_R- | -0.4291 | -0.4762 | Unidentified         |
| SU-WWTP | 3 | TP_R- | -0.4161 | -0.4761 | Unidentified         |
| SU-WWTP | 3 | TP_R- | -0.4305 | -0.4760 | Unidentified         |
| SU-WWTP | 3 | TP_R- | -0.4545 | -0.4749 | Kouleothrix          |
| SU-WWTP | 3 | TN_R- | -0.4736 | -0.4541 | Lentimicrobium       |
| SU-WWTP | 3 | TP_R- |         | -0.4710 | CL500-3              |
| SU-WWTP | 3 | TN_R- | -0.4706 | -0.3563 | Unidentified         |
| SU-WWTP | 3 | TN_R- | -0.4695 | -0.4377 | Unidentified         |
| SU-WWTP | 3 | TN_R- | -0.4686 | -0.4231 | Ferruginibacter      |
| SU-WWTP | 3 | TP_R- |         | -0.4674 | Unidentified         |
| SU-WWTP | 3 | TN_R- | -0.4669 | -0.3859 | Comamonas            |
| SU-WWTP | 2 | TN_R- | -0.4656 |         | Unidentified         |
| SU-WWTP | 3 | TN_R- | -0.4655 | -0.4285 | Crenothrix           |
| SU-WWTP | 3 | TP_R- | -0.3477 | -0.4655 | Iamia                |
| SU-WWTP | 3 | TP_R- |         | -0.4654 | Ca_Microthrix        |
| SU-WWTP | 3 | TN_R- | -0.4651 | -0.3600 | Escherichia-Shigella |
| SU-WWTP | 3 | TP_R- | -0.4235 | -0.4647 | Unidentified         |
| SU-WWTP | 3 | TP_R- | -0.4134 | -0.4632 | Phaselicystis        |
| SU-WWTP | 3 | TP_R- | -0.4538 | -0.4621 | Unidentified         |
| SU-WWTP | 3 | TN_R- | -0.4619 | -0.4313 | Unidentified         |

|         |   |        |         |         |                  |
|---------|---|--------|---------|---------|------------------|
| SU-WWTP | 3 | TP_R-  | -0.4057 | -0.4602 | Unidentified     |
| SU-WWTP | 3 | TN_R-  | -0.4599 | -0.4565 | Unidentified     |
| SU-WWTP | 3 | TP_R-  | -0.3166 | -0.4597 | Tetrasphaera     |
| SU-WWTP | 3 | TP_R-  |         | -0.4597 | JGI_0001001-H03  |
| SU-WWTP | 3 | TP_R-  | -0.3503 | -0.4595 | Unidentified     |
| SU-WWTP | 3 | TN_R-  | -0.4573 |         | Dechloromonas    |
| SU-WWTP | 3 | TN_R-  | -0.4550 | -0.4429 | Unidentified     |
| SU-WWTP | 3 | TN_R-  | -0.4548 | -0.4230 | Unidentified     |
| SU-WWTP | 3 | TP_R-  | -0.3701 | -0.4534 | Unidentified     |
| SU-WWTP | 3 | TP_R-  |         | -0.4526 | Unidentified     |
| SU-WWTP | 3 | TN_R-  | -0.4488 | -0.3606 | Unidentified     |
| SU-WWTP | 3 | TN_R-  | -0.4487 | -0.3885 | Ca_Promineofilum |
| SU-WWTP | 3 | TN_R-  | -0.4471 |         | Thiothrix        |
| SU-WWTP | 3 | TP_R-  | -0.3268 | -0.4469 | Kouleothrix      |
| SU-WWTP | 3 | TN_R-  | -0.4461 |         | Unidentified     |
| SU-WWTP | 3 | TP_R-  |         | -0.4432 | Hyphomicrobium   |
| SU-WWTP | 3 | TP_R-  | -0.4128 | -0.4432 | Unidentified     |
| SU-WWTP | 3 | TN_R-  | -0.4424 |         | Unidentified     |
| SU-WWTP | 3 | TP_R-  |         | -0.4413 | Unidentified     |
| SU-WWTP | 3 | TN_R-  | -0.4401 | -0.3835 | Unidentified     |
| SU-WWTP | 3 | TN_R-  | -0.4393 | -0.3502 | Unidentified     |
| SU-WWTP | 3 | TP_R-  | -0.4172 | -0.4382 | Unidentified     |
| SU-WWTP | 3 | TP_R-  |         | -0.4367 | Lautropia        |
| SU-WWTP | 3 | TP_R-  | -0.3998 | -0.4367 | Kouleothrix      |
| SU-WWTP | 3 | TP_R-  | -0.4333 | -0.4364 | Unidentified     |
| SU-WWTP | 3 | BOD R- | -0.4362 | -0.3096 | Unidentified     |
| SU-WWTP | 3 | TP_R-  |         | -0.4362 | Kouleothrix      |
| SU-WWTP | 3 | TP_R-  | -0.4298 | -0.4357 | Unidentified     |
| SU-WWTP | 3 | TP_R-  |         | -0.4347 | Unidentified     |
| SU-WWTP | 3 | TN_R-  | -0.4346 | -0.3427 | Unidentified     |
| SU-WWTP | 3 | TP_R-  | -0.3776 | -0.4331 | Unidentified     |
| SU-WWTP | 3 | TN_R-  | -0.4310 | -0.4191 | Unidentified     |
| SU-WWTP | 3 | TP_R-  | -0.3738 | -0.4308 | Unidentified     |
| SU-WWTP | 3 | TP_R-  | -0.3938 | -0.4293 | Unidentified     |
| SU-WWTP | 3 | TN_R-  | -0.4288 |         | Unidentified     |
| SU-WWTP | 3 | TN_R-  | -0.4280 |         | Unidentified     |
| SU-WWTP | 3 | TN_R-  | -0.4276 |         | SM1A02           |
| SU-WWTP | 3 | TN_R-  | -0.4276 | -0.3227 | Chitinivorax     |
| SU-WWTP | 2 | TN_R-  | -0.4268 |         | Unidentified     |
| SU-WWTP | 3 | TN_R-  | -0.4259 | -0.4184 | Nitrosomonas     |
| SU-WWTP | 3 | TP_R-  | -0.3881 | -0.4254 | Arenimonas       |
| SU-WWTP | 3 | TN_R-  | -0.4244 | -0.3270 | Unidentified     |
| SU-WWTP | 3 | TP_R-  | -0.3890 | -0.4240 | Pir4_lineage     |
| SU-WWTP | 3 | TP_R-  | -0.3793 | -0.4234 | Unidentified     |
| SU-WWTP | 3 | TN_R-  | -0.4228 | -0.4043 | Unidentified     |
| SU-WWTP | 3 | TN_R-  | -0.4222 | -0.3931 | Nordella         |

|         |   |       |         |                          |
|---------|---|-------|---------|--------------------------|
| SU-WWTP | 3 | TP_R- | -0.4222 | JGI_0001001-H03          |
| SU-WWTP | 2 | TN_R- | -0.4216 | -0.3461 Unidentified     |
| SU-WWTP | 3 | TP_R- | -0.4213 | Kouleothrix              |
| SU-WWTP | 3 | TP_R- | -0.4198 | CL500-29_marine_group    |
| SU-WWTP | 3 | TP_R- | -0.3136 | -0.4195 Ellin6067        |
| SU-WWTP | 3 | TN_R- | -0.4194 | -0.3120 Dechloromonas    |
| SU-WWTP | 3 | TP_R- | -0.3410 | -0.4186 Unidentified     |
| SU-WWTP | 3 | TP_R- | -0.4178 | Oikopleura               |
| SU-WWTP | 3 | TP_R- | -0.3991 | -0.4167 Unidentified     |
| SU-WWTP | 3 | TN_R- | -0.4148 | -0.3075 Ca_Epiflobacter  |
| SU-WWTP | 3 | TN_R- | -0.4147 | Unidentified             |
| SU-WWTP | 3 | TP_R- | -0.3200 | -0.4145 Unidentified     |
| SU-WWTP | 3 | TN_R- | -0.4129 | -0.3801 Unidentified     |
| SU-WWTP | 3 | TN_R- | -0.4128 | SWB02                    |
| SU-WWTP | 3 | TP_R- | -0.4122 | Unidentified             |
| SU-WWTP | 3 | TN_R- | -0.4114 | Dechloromonas            |
| SU-WWTP | 3 | TN_R- | -0.4113 | Unidentified             |
| SU-WWTP | 3 | TN_R- | -0.4111 | Unidentified             |
| SU-WWTP | 3 | TP_R- | -0.3957 | -0.4108 Ca_Alysiosphaera |
| SU-WWTP | 3 | TN_R- | -0.4099 | -0.3030 Unidentified     |
| SU-WWTP | 3 | TN_R- | -0.4094 | -0.4025 Unidentified     |
| SU-WWTP | 3 | TN_R- | -0.4093 | -0.3305 Unidentified     |
| SU-WWTP | 3 | TN_R- | -0.4092 | -0.3226 Unidentified     |
| SU-WWTP | 3 | TP_R- | -0.3979 | -0.4085 Unidentified     |
| SU-WWTP | 3 | TN_R- | -0.4075 | -0.3422 Ca_Cometibacter  |
| SU-WWTP | 2 | TN_R- | -0.4065 | Pirellula                |
| SU-WWTP | 3 | TP_R- | -0.4064 | Unidentified             |
| SU-WWTP | 3 | TN_R- | -0.4063 | -0.3462 Unidentified     |
| SU-WWTP | 3 | TN_R- | -0.4061 | Mycobacterium            |
| SU-WWTP | 2 | TN_R- | -0.4061 | Dechloromonas            |
| SU-WWTP | 3 | TP_R- | -0.3340 | -0.4060 SH-PL14          |
| SU-WWTP | 3 | TN_R- | -0.4046 | Unidentified             |
| SU-WWTP | 3 | TP_R- | -0.3620 | -0.4043 SM1A02           |
| SU-WWTP | 3 | TN_R- | -0.4042 | Unidentified             |
| SU-WWTP | 3 | TN_R- | -0.4041 | -0.3197 AKYG587          |
| SU-WWTP | 3 | TP_R- | -0.3971 | -0.4016 Unidentified     |
| SU-WWTP | 3 | TN_R- | -0.4007 | -0.3993 Ca_Megaira       |
| SU-WWTP | 3 | TN_R- | -0.3996 | -0.3871 Unidentified     |
| SU-WWTP | 3 | TP_R- | -0.3953 | -0.3992 Methylosarcina   |
| SU-WWTP | 3 | TN_R- | -0.3989 | -0.3260 Terrimonas       |
| SU-WWTP | 3 | TN_R- | -0.3980 | Unidentified             |
| SU-WWTP | 3 | TP_R- | -0.3974 | Neochlamydia             |
| SU-WWTP | 3 | TP_R- | -0.3388 | -0.3974 Unidentified     |
| SU-WWTP | 3 | TP_R- | -0.3968 | Unidentified             |
| SU-WWTP | 3 | TP_R- | -0.3966 | Methanothrix             |
| SU-WWTP | 3 | TP_R- | -0.3317 | -0.3961 Unidentified     |

|         |   |       |         |         |                            |
|---------|---|-------|---------|---------|----------------------------|
| SU-WWTP | 3 | TN_R- | -0.3958 | -0.3791 | Haliangium                 |
| SU-WWTP | 3 | TP_R- |         | -0.3957 | Pirellula                  |
| SU-WWTP | 2 | TN_R- | -0.3953 |         | Unidentified               |
| SU-WWTP | 3 | TP_R- |         | -0.3952 | Unidentified               |
| SU-WWTP | 3 | TP_R- | -0.3848 | -0.3936 | Unidentified               |
| SU-WWTP | 3 | TN_R- | -0.3931 | -0.3129 | Dechloromonas              |
| SU-WWTP | 3 | TP_R- | -0.3336 | -0.3929 | Gemmata                    |
| SU-WWTP | 3 | TP_R- | -0.3092 | -0.3920 | Unidentified               |
| SU-WWTP | 2 | TN_R- | -0.3920 |         | Singulisphaera             |
| SU-WWTP | 3 | TN_R- | -0.3919 | -0.3056 | Unidentified               |
| SU-WWTP | 3 | TP_R- | -0.3656 | -0.3918 | Unidentified               |
| SU-WWTP | 3 | TP_R- | -0.3639 | -0.3917 | Unidentified               |
| SU-WWTP | 3 | TP_R- |         | -0.3915 | Unidentified               |
| SU-WWTP | 3 | TN_R- | -0.3909 | -0.3878 | Unidentified               |
| SU-WWTP | 2 | TN_R- | -0.3905 | -0.3338 | Unidentified               |
| SU-WWTP | 3 | TN_R- | -0.3904 | -0.3613 | Sphingopyxis               |
| SU-WWTP | 3 | TP_R- |         | -0.3902 | Unidentified               |
| SU-WWTP | 3 | TP_R- |         | -0.3900 | Unidentified               |
| SU-WWTP | 3 | TN_R- | -0.3896 |         | Unidentified               |
| SU-WWTP | 2 | TN_R- | -0.3889 |         | Unidentified               |
| SU-WWTP | 3 | TN_R- | -0.3885 | -0.3328 | Kouleothrix                |
| SU-WWTP | 3 | TN_R- | -0.3884 | -0.3198 | Unidentified               |
| SU-WWTP | 2 | TN_R- | -0.3880 |         | Unidentified               |
| SU-WWTP | 3 | TP_R- | -0.3218 | -0.3878 | Stella                     |
| SU-WWTP | 3 | TP_R- |         | -0.3875 | Unidentified               |
| SU-WWTP | 3 | TP_R- |         | -0.3873 | Unidentified               |
| SU-WWTP | 3 | TP_R- |         | -0.3868 | Unidentified               |
| SU-WWTP | 2 | TN_R- | -0.3865 |         | Unidentified               |
| SU-WWTP | 3 | TP_R- |         | -0.3861 | Stenotrophobacter          |
| SU-WWTP | 3 | TN_R- | -0.3846 | -0.3516 | OM27_clade                 |
| SU-WWTP | 3 | TP_R- |         | -0.3843 | Ferruginibacter            |
| SU-WWTP | 3 | TP_R- | -0.3595 | -0.3839 | Haliangium                 |
| SU-WWTP | 3 | TN_R- | -0.3836 | -0.3428 | Unidentified               |
| SU-WWTP | 3 | TN_R- | -0.3835 | -0.3489 | Sandaracinus               |
| SU-WWTP | 3 | TP_R- |         | -0.3823 | OLB8                       |
| SU-WWTP | 3 | TP_R- |         | -0.3819 | Ferruginibacter            |
| SU-WWTP | 3 | TP_R- |         | -0.3815 | Pirellula                  |
| SU-WWTP | 3 | TN_R- | -0.3805 | -0.3480 | Neochlamydia               |
| SU-WWTP | 3 | TP_R- |         | -0.3792 | Unidentified               |
| SU-WWTP | 3 | TN_R- | -0.3790 |         | Unidentified               |
| SU-WWTP | 3 | TN_R- | -0.3780 |         | Unidentified               |
| SU-WWTP | 3 | TP_R- | -0.3635 | -0.3774 | Unidentified               |
| SU-WWTP | 3 | TN_R- | -0.3773 | -0.3183 | Agitococcus_lubricus_group |
| SU-WWTP | 3 | TN_R- | -0.3765 |         | Pajaroellobacter           |
| SU-WWTP | 3 | TP_R- |         | -0.3762 | Blastocatella              |
| SU-WWTP | 3 | TP_R- |         | -0.3755 | Ideonella                  |



|         |   |       |         |         |                  |
|---------|---|-------|---------|---------|------------------|
| SU-WWTP | 3 | TN_R- | -0.3754 | -0.3327 | Blastopirellula  |
| SU-WWTP | 3 | TN_R- | -0.3742 | -0.3415 | Nannocystis      |
| SU-WWTP | 3 | TP_R- | -0.3310 | -0.3735 | Chthoniobacter   |
| SU-WWTP | 3 | TP_R- | -0.3205 | -0.3717 | Unidentified     |
| SU-WWTP | 3 | TP_R- |         | -0.3715 | OLB12            |
| SU-WWTP | 3 | TN_R- | -0.3714 |         | Pirellula        |
| SU-WWTP | 3 | TN_R- | -0.3709 | -0.3032 | Pirellula        |
| SU-WWTP | 3 | TP_R- |         | -0.3708 | Unidentified     |
| SU-WWTP | 3 | TN_R- | -0.3704 |         | SH3-11           |
| SU-WWTP | 3 | TP_R- |         | -0.3704 | Nannocystis      |
| SU-WWTP | 3 | TP_R- | -0.3527 | -0.3699 | Gordonia         |
| SU-WWTP | 3 | TP_R- |         | -0.3690 | Unidentified     |
| SU-WWTP | 3 | TP_R- |         | -0.3688 | Unidentified     |
| SU-WWTP | 3 | TP_R- |         | -0.3681 | Unidentified     |
| SU-WWTP | 3 | TP_R- |         | -0.3676 | Flavobacterium   |
| SU-WWTP | 3 | TP_R- |         | -0.3673 | Unidentified     |
| SU-WWTP | 3 | TP_R- |         | -0.3662 | Unidentified     |
| SU-WWTP | 3 | TN_R- | -0.3653 |         | Oikopleura       |
| SU-WWTP | 3 | TN_R- | -0.3651 | -0.3167 | Bradyrhizobium   |
| SU-WWTP | 3 | TP_R- |         | -0.3645 | Thermomonas      |
| SU-WWTP | 3 | TN_R- | -0.3644 | -0.3632 | Tetrasphaera     |
| SU-WWTP | 3 | TP_R- |         | -0.3641 | Unidentified     |
| SU-WWTP | 3 | TN_R- | -0.3635 |         | Reyranella       |
| SU-WWTP | 3 | TP_R- |         | -0.3634 | Unidentified     |
| SU-WWTP | 3 | TN_R- | -0.3628 | -0.3142 | Unidentified     |
| SU-WWTP | 3 | TN_R- | -0.3620 |         | Unidentified     |
| SU-WWTP | 3 | TN_R- | -0.3615 |         | Halomonas        |
| SU-WWTP | 3 | TP_R- |         | -0.3614 | Unidentified     |
| SU-WWTP | 3 | TP_R- | -0.3128 | -0.3613 | Unidentified     |
| SU-WWTP | 3 | TP_R- |         | -0.3611 | Terrimonas       |
| SU-WWTP | 3 | TP_R- |         | -0.3605 | Polymorphobacter |
| SU-WWTP | 2 | TN_R- | -0.3588 |         | Pseudomonas      |
| SU-WWTP | 3 | TP_R- | -0.3200 | -0.3586 | Unidentified     |
| SU-WWTP | 3 | TP_R- |         | -0.3586 | Unidentified     |
| SU-WWTP | 3 | TP_R- |         | -0.3582 | Unidentified     |
| SU-WWTP | 3 | TP_R- |         | -0.3575 | Unidentified     |
| SU-WWTP | 3 | TP_R- |         | -0.3572 | Unidentified     |
| SU-WWTP | 3 | TP_R- |         | -0.3570 | Unidentified     |
| SU-WWTP | 3 | TP_R- | -0.3059 | -0.3563 | Unidentified     |
| SU-WWTP | 3 | TP_R- |         | -0.3551 | Prevotella_9     |
| SU-WWTP | 3 | TN_R- | -0.3530 |         | Turneriella      |
| SU-WWTP | 3 | TP_R- | -0.3297 | -0.3529 | Unidentified     |
| SU-WWTP | 3 | TN_R- | -0.3528 |         | Lentimicrobium   |
| SU-WWTP | 3 | TP_R- | -0.3332 | -0.3516 | Unidentified     |
| SU-WWTP | 3 | TP_R- |         | -0.3509 | SM1A02           |
| SU-WWTP | 3 | TP_R- |         | -0.3507 | Unidentified     |

|         |   |       |         |         |                       |
|---------|---|-------|---------|---------|-----------------------|
| SU-WWTP | 3 | TN_R- | -0.3507 |         | Unidentified          |
| SU-WWTP | 3 | TP_R- |         | -0.3501 | Marmoricola           |
| SU-WWTP | 1 | TN_R+ | 0.3504  | 0.3289  | Unidentified          |
| SU-WWTP | 2 | TP_R+ |         | 0.3512  | Sphaerotilus          |
| SU-WWTP | 1 | TP_R+ |         | 0.3514  | Pirellula             |
| SU-WWTP | 2 | TN_R+ | 0.3535  | 0.3015  | Unidentified          |
| SU-WWTP | 1 | TP_R+ |         | 0.3544  | Ferruginibacter       |
| SU-WWTP | 1 | TN_R+ | 0.3547  |         | Unidentified          |
| SU-WWTP | 1 | TP_R+ |         | 0.3557  | Pirellula             |
| SU-WWTP | 1 | TP_R+ |         | 0.3574  | Unidentified          |
| SU-WWTP | 1 | TN_R+ | 0.3583  |         | Verrucomicrobium      |
| SU-WWTP | 1 | TP_R+ |         | 0.3609  | Unidentified          |
| SU-WWTP | 1 | TP_R+ |         | 0.3616  | Unidentified          |
| SU-WWTP | 3 | TN_R+ | 0.3617  |         | XBB1006               |
| SU-WWTP | 1 | TN_R+ | 0.3621  |         | Unidentified          |
| SU-WWTP | 2 | TN_R+ | 0.3639  |         | Rhodobacter           |
| SU-WWTP | 1 | TP_R+ | 0.3057  | 0.3643  | Unidentified          |
| SU-WWTP | 1 | TN_R+ | 0.3713  | 0.3685  | Unidentified          |
| SU-WWTP | 1 | TP_R+ |         | 0.3721  | Unidentified          |
| SU-WWTP | 1 | TP_R+ |         | 0.3747  | Unidentified          |
| SU-WWTP | 3 | TN_R+ | 0.3759  |         | Ramlibacter           |
| SU-WWTP | 1 | TP_R+ | 0.3605  | 0.3770  | Bradyrhizobium        |
| SU-WWTP | 1 | TP_R+ |         | 0.3772  | Unidentified          |
| SU-WWTP | 2 | TP_R+ |         | 0.3792  | Gordonia              |
| SU-WWTP | 2 | TN_R+ | 0.3832  | 0.3641  | Streptococcus         |
| SU-WWTP | 1 | TP_R+ | 0.3626  | 0.3851  | Unidentified          |
| SU-WWTP | 3 | TN_R+ | 0.3879  |         | Ca_Accumulibacter     |
| SU-WWTP | 1 | TP_R+ |         | 0.3898  | Unidentified          |
| SU-WWTP | 1 | TN_R+ | 0.3899  | 0.3624  | Unidentified          |
| SU-WWTP | 1 | TN_R+ | 0.3906  | 0.3497  | Unidentified          |
| SU-WWTP | 1 | TN_R+ | 0.3916  | 0.3822  | CL500-29_marine_group |
| SU-WWTP | 1 | TN_R+ | 0.3921  | 0.3866  | Unidentified          |
| SU-WWTP | 1 | TN_R+ | 0.3931  | 0.3584  | Unidentified          |
| SU-WWTP | 1 | TP_R+ |         | 0.3965  | Anaerolinea           |
| SU-WWTP | 1 | TP_R+ | 0.3156  | 0.4023  | Subgroup_10           |
| SU-WWTP | 2 | TP_R+ |         | 0.4048  | Ca_Promineofilum      |
| SU-WWTP | 3 | TP_R+ | 0.3664  | 0.4058  | Unidentified          |
| SU-WWTP | 2 | TP_R+ |         | 0.4062  | Leptolinea            |
| SU-WWTP | 1 | TP_R+ |         | 0.4069  | Unidentified          |
| SU-WWTP | 1 | TN_R+ | 0.4089  |         | Tetrasphaera          |
| SU-WWTP | 2 | TN_R+ | 0.4144  |         | Bdellovibrio          |
| SU-WWTP | 1 | TP_R+ | 0.4125  | 0.4182  | Ellin6067             |
| SU-WWTP | 1 | TP_R+ | 0.3270  | 0.4192  | Unidentified          |
| SU-WWTP | 1 | TP_R+ | 0.3332  | 0.4204  | Ca_Amarolinea         |
| SU-WWTP | 2 | TP_R+ | 0.3398  | 0.4208  | Unidentified          |
| SU-WWTP | 1 | TN_R+ | 0.4244  | 0.3130  | Unidentified          |

|         |   |        |        |        |        |                      |
|---------|---|--------|--------|--------|--------|----------------------|
| SU-WWTP | 1 | TN_R+  |        | 0.4252 | 0.3318 | Unidentified         |
| SU-WWTP | 2 | TP_R+  |        | 0.3053 | 0.4253 | Ca_Methylophosphatis |
| SU-WWTP | 1 | TP_R+  |        | 0.3964 | 0.4255 | Unidentified         |
| SU-WWTP | 3 | TN_R+  |        | 0.4255 |        | Actinomyces          |
| SU-WWTP | 2 | TN_R+  |        | 0.4283 |        | Enhydrobacter        |
| SU-WWTP | 2 | TN_R+  |        | 0.4309 | 0.3478 | Unidentified         |
| SU-WWTP | 2 | TP_R+  |        | 0.3436 | 0.4322 | Unidentified         |
| SU-WWTP | 1 | TP_R+  |        | 0.3691 | 0.4342 | Unidentified         |
| SU-WWTP | 1 | TP_R+  |        | 0.3779 | 0.4356 | Unidentified         |
| SU-WWTP | 1 | TP_R+  |        |        | 0.4374 | BD1-7_clade          |
| SU-WWTP | 1 | TN_R+  |        | 0.4391 | 0.3879 | Leptothrix           |
| SU-WWTP | 2 | TP_R+  |        |        | 0.4434 | Unidentified         |
| SU-WWTP | 1 | TP_R+  |        |        | 0.4445 | Unidentified         |
| SU-WWTP | 1 | TP_R+  |        |        | 0.4468 | Geothrix             |
| SU-WWTP | 3 | BOD_R+ | 0.4507 |        |        | Unidentified         |
| SU-WWTP | 1 | TP_R+  |        | 0.3916 | 0.4524 | Unidentified         |
| SU-WWTP | 1 | TN_R+  |        | 0.4525 | 0.4080 | Terrimonas           |
| SU-WWTP | 2 | TN_R+  |        | 0.4527 |        | Ruminococcus         |
| SU-WWTP | 3 | TN_R+  |        | 0.4572 | 0.4528 | Unidentified         |
| SU-WWTP | 1 | TP_R+  |        | 0.3927 | 0.4585 | Unidentified         |
| SU-WWTP | 1 | TP_R+  |        |        | 0.4606 | SM1A02               |
| SU-WWTP | 2 | TP_R+  |        | 0.4463 | 0.4634 | Unidentified         |
| SU-WWTP | 1 | TP_R+  |        | 0.3495 | 0.4646 | Unidentified         |
| SU-WWTP | 3 | TN_R+  |        | 0.4672 | 0.3854 | Unidentified         |
| SU-WWTP | 2 | BOD_R+ | 0.4739 |        |        | Ca_Epiflobacter      |
| SU-WWTP | 1 | TP_R+  |        | 0.4371 | 0.4765 | Unidentified         |
| SU-WWTP | 1 | TP_R+  |        | 0.4236 | 0.4780 | Unidentified         |
| SU-WWTP | 1 | TP_R+  |        | 0.3829 | 0.4798 | Fimbrioglobus        |
| SU-WWTP | 1 | TN_R+  |        | 0.4812 | 0.4122 | Terrimonas           |
| SU-WWTP | 1 | TP_R+  |        | 0.3969 | 0.4849 | Unidentified         |
| SU-WWTP | 1 | TP_R+  |        | 0.4642 | 0.4857 | Fimbrioglobus        |
| SU-WWTP | 1 | TP_R+  |        | 0.3795 | 0.4868 | Unidentified         |
| SU-WWTP | 1 | TN_R+  |        | 0.4900 | 0.4734 | Unidentified         |
| SU-WWTP | 1 | TP_R+  |        | 0.3109 | 0.4908 | Unidentified         |
| SU-WWTP | 1 | TN_R+  |        | 0.4970 | 0.4230 | Unidentified         |
| SU-WWTP | 1 | TP_R+  |        | 0.4087 | 0.4980 | Unidentified         |
| SU-WWTP | 1 | TP_R+  |        | 0.4244 | 0.4985 | JGI_0001001-H03      |
| SU-WWTP | 1 | TN_R+  |        | 0.4997 | 0.4277 | Unidentified         |
| SU-WWTP | 1 | TP_R+  |        | 0.4247 | 0.5009 | Unidentified         |
| SU-WWTP | 1 | TP_R+  |        | 0.3959 | 0.5072 | Unidentified         |
| SU-WWTP | 1 | TP_R+  |        | 0.4771 | 0.5114 | Unidentified         |
| SU-WWTP | 3 | TN_R+  |        | 0.5196 | 0.3933 | Lacihabitans         |
| SU-WWTP | 1 | TN_R+  |        | 0.5215 | 0.4497 | Marmoricola          |
| SU-WWTP | 1 | TP_R+  |        | 0.4666 | 0.5270 | Prostheco bacter     |
| SU-WWTP | 1 | TP_R+  |        |        | 0.5286 | Unidentified         |
| SU-WWTP | 1 | TN_R+  |        | 0.5307 | 0.5274 | Unidentified         |

|         |   |       |        |        |                    |
|---------|---|-------|--------|--------|--------------------|
| SU-WWTP | 1 | TN_R+ | 0.5323 | 0.5015 | Unidentified       |
| SU-WWTP | 1 | TP_R+ | 0.5049 | 0.5371 | Nitrosomonas       |
| SU-WWTP | 1 | TP_R+ | 0.4026 | 0.5377 | Ca_Sarcinithrix    |
| SU-WWTP | 1 | TP_R+ | 0.4326 | 0.5382 | Unidentified       |
| SU-WWTP | 1 | TN_R+ | 0.5415 | 0.4139 | Unidentified       |
| SU-WWTP | 1 | TP_R+ | 0.4393 | 0.5534 | Ca_Amarolinea      |
| SU-WWTP | 1 | TN_R+ | 0.5540 | 0.5393 | Unidentified       |
| SU-WWTP | 1 | TP_R+ | 0.4516 | 0.5591 | SH-PL14            |
| SU-WWTP | 1 | TN_R+ | 0.5605 | 0.5213 | Schlesneria        |
| SU-WWTP | 1 | TP_R+ |        | 0.5636 | Unidentified       |
| SU-WWTP | 1 | TP_R+ | 0.5033 | 0.5675 | Unidentified       |
| SU-WWTP | 1 | TP_R+ | 0.5344 | 0.5703 | Ahniella           |
| SU-WWTP | 1 | TP_R+ | 0.4354 | 0.5724 | Unidentified       |
| SU-WWTP | 1 | TP_R+ | 0.4787 | 0.5737 | Uliginosibacterium |
| SU-WWTP | 1 | TP_R+ | 0.5068 | 0.5748 | Bryobacter         |
| SU-WWTP | 1 | TN_R+ | 0.5748 | 0.5029 | Unidentified       |
| SU-WWTP | 1 | TN_R+ | 0.5832 | 0.5785 | Mesorhizobium      |
| SU-WWTP | 1 | TN_R+ | 0.5866 | 0.5695 | Unidentified       |
| SU-WWTP | 1 | TP_R+ | 0.5104 | 0.6085 | Unidentified       |
| SU-WWTP | 1 | TP_R+ | 0.4937 | 0.6085 | Unidentified       |
| SU-WWTP | 1 | TP_R+ | 0.4841 | 0.6123 | Unidentified       |
| SU-WWTP | 1 | TP_R+ | 0.5278 | 0.6129 | Unidentified       |
| SU-WWTP | 1 | TP_R+ | 0.5139 | 0.6159 | Unidentified       |
| SU-WWTP | 1 | TP_R+ | 0.5770 | 0.6170 | Unidentified       |
| SU-WWTP | 1 | TP_R+ | 0.5113 | 0.6258 | Unidentified       |
| SU-WWTP | 1 | TP_R+ | 0.4612 | 0.6395 | Unidentified       |
| SU-WWTP | 1 | TP_R+ | 0.5465 | 0.6414 | Unidentified       |
| SU-WWTP | 1 | TP_R+ | 0.5677 | 0.6441 | Unidentified       |
| SU-WWTP | 1 | TP_R+ | 0.5429 | 0.6673 | Unidentified       |
| SU-WWTP | 1 | TP_R+ | 0.6286 | 0.6697 | Ahniella           |
| SU-WWTP | 1 | TP_R+ | 0.6307 | 0.6757 | Unidentified       |
| SU-WWTP | 1 | TP_R+ | 0.5870 | 0.6901 | Unidentified       |
| SU-WWTP | 1 | TP_R+ | 0.6955 | 0.7008 | JGI 0001001-H03    |

**SUPPLEMENTARY TABLE 2.** Spearman's rank correlation coefficients between time-point network topology metrics. On the left coefficients of FF-WWTP and on the right coefficients of SU-WWTP.

|                             | Modularity  | Clustering coefficient | Porportion of co-exclusions |
|-----------------------------|-------------|------------------------|-----------------------------|
| Modularity                  | 1/1         | -0.50/-0.87            | 0.52/0.85                   |
| Clustering coefficient      | -0.50/-0.87 | 1/1                    | -0.58/-0.87                 |
| Porportion of co-exclusions | 0.52/0.85   | -0.58/-0.87            | 1/1                         |

**SUPPLEMENTARY TABLE 3.** Phylogenetic dispersion and  $\alpha$ -diversity metrics

| <b>Sample</b> | <b>WWTP</b> | <b>NTI</b> | <b>NRI</b> | <b><sup>0</sup>pD</b> | <b><sup>0</sup>D</b> | <b><sup>1</sup>D</b> | <b><sup>2</sup>D</b> |
|---------------|-------------|------------|------------|-----------------------|----------------------|----------------------|----------------------|
| FF.1          | FF-WWTP     | 2,916      | 2,740      | 184,506               | 1473                 | 388,696              | 149,829              |
| FF.1          | FF-WWTP     | 3,528      | 3,100      | 116,099               | 850                  | 297,363              | 128,897              |
| FF.1          | FF-WWTP     | 3,967      | 2,134      | 172,512               | 1520                 | 538,378              | 192,794              |
| FF.2          | FF-WWTP     | 4,026      | 2,580      | 88,839                | 621                  | 282,104              | 138,860              |
| FF.2          | FF-WWTP     | 3,337      | 2,308      | 98,107                | 584                  | 273,897              | 128,528              |
| FF.2          | FF-WWTP     | 3,358      | 2,435      | 100,254               | 737                  | 304,304              | 136,959              |
| FF.3          | FF-WWTP     | 3,588      | 2,489      | 81,924                | 502                  | 236,022              | 118,809              |
| FF.3          | FF-WWTP     | 3,280      | 2,058      | 86,399                | 540                  | 248,731              | 122,555              |
| FF.3          | FF-WWTP     | 3,115      | 2,426      | 145,577               | 1048                 | 365,504              | 142,765              |
| FF.4          | FF-WWTP     | 3,061      | 2,062      | 109,172               | 826                  | 299,560              | 118,162              |
| FF.4          | FF-WWTP     | 3,221      | 2,165      | 88,644                | 594                  | 253,308              | 117,671              |
| FF.4          | FF-WWTP     | 3,009      | 2,512      | 108,361               | 790                  | 303,667              | 122,999              |
| FF.5          | FF-WWTP     | 1,082      | -0,101     | 216,730               | 1402                 | 302,354              | 90,122               |
| FF.5          | FF-WWTP     | 1,580      | 1,347      | 149,209               | 1019                 | 237,873              | 55,414               |
| FF.5          | FF-WWTP     | 1,464      | 1,344      | 172,312               | 1109                 | 259,117              | 58,257               |
| FF.6          | FF-WWTP     | 2,505      | 2,721      | 132,935               | 1182                 | 333,558              | 98,334               |
| FF.6          | FF-WWTP     | 2,066      | 2,141      | 141,117               | 1230                 | 321,288              | 90,394               |
| FF.6          | FF-WWTP     | 2,120      | 2,423      | 148,211               | 1312                 | 356,721              | 104,740              |
| FF.7          | FF-WWTP     | 2,602      | 2,112      | 117,632               | 945                  | 342,839              | 126,053              |
| FF.7          | FF-WWTP     | 2,451      | 1,755      | 102,621               | 779                  | 282,682              | 90,290               |
| FF.7          | FF-WWTP     | 2,490      | 1,616      | 91,815                | 609                  | 247,865              | 87,373               |
| FF.8          | FF-WWTP     | 2,422      | 2,458      | 162,517               | 1424                 | 397,315              | 134,168              |
| FF.8          | FF-WWTP     | 2,515      | 2,334      | 159,900               | 1241                 | 386,777              | 136,543              |
| FF.8          | FF-WWTP     | 2,428      | 1,892      | 128,203               | 885                  | 300,311              | 104,709              |
| FF.9          | FF-WWTP     | 3,048      | 2,432      | 72,049                | 555                  | 219,314              | 77,446               |
| FF.9          | FF-WWTP     | 2,604      | 2,338      | 90,772                | 785                  | 246,826              | 76,412               |
| FF.9          | FF-WWTP     | 2,560      | 1,803      | 67,847                | 492                  | 156,517              | 48,042               |
| FF.10         | FF-WWTP     | 2,883      | 1,822      | 69,411                | 414                  | 118,352              | 42,964               |
| FF.10         | FF-WWTP     | 2,584      | 1,620      | 175,033               | 1404                 | 342,288              | 109,255              |
| FF.10         | FF-WWTP     | 2,655      | 1,257      | 143,208               | 1023                 | 309,508              | 102,315              |
| FF.11         | FF-WWTP     | 3,082      | 2,143      | 133,005               | 1132                 | 357,864              | 139,242              |
| FF.11         | FF-WWTP     | 3,265      | 1,879      | 121,751               | 850                  | 322,965              | 138,961              |
| FF.11         | FF-WWTP     | 3,448      | 2,216      | 92,784                | 688                  | 257,914              | 108,333              |
| FF.12         | FF-WWTP     | 3,106      | 1,705      | 99,406                | 739                  | 280,581              | 122,597              |
| FF.12         | FF-WWTP     | 3,128      | 1,437      | 91,962                | 631                  | 254,705              | 113,531              |
| FF.12         | FF-WWTP     | 3,084      | 1,169      | 114,350               | 721                  | 276,564              | 116,818              |
| FF.13         | FF-WWTP     | 3,784      | 1,963      | 98,862                | 736                  | 306,322              | 146,062              |
| FF.13         | FF-WWTP     | 3,027      | 1,317      | 130,142               | 885                  | 322,790              | 130,267              |
| FF.13         | FF-WWTP     | 3,159      | 2,178      | 147,219               | 1171                 | 380,680              | 158,659              |
| FF.14         | FF-WWTP     | 2,614      | 1,688      | 120,419               | 910                  | 294,452              | 103,379              |
| FF.14         | FF-WWTP     | 2,791      | 1,988      | 142,510               | 1017                 | 344,048              | 125,267              |
| FF.14         | FF-WWTP     | 2,440      | 1,575      | 137,053               | 946                  | 312,904              | 108,792              |
| FF.15         | FF-WWTP     | 2,515      | 1,282      | 121,119               | 746                  | 266,865              | 98,580               |

|       |         |       |        |         |      |         |         |
|-------|---------|-------|--------|---------|------|---------|---------|
| FF.15 | FF-WWTP | 2,501 | 1,247  | 121,052 | 691  | 248,646 | 90,216  |
| FF.15 | FF-WWTP | 2,729 | 1,367  | 115,189 | 645  | 243,615 | 93,836  |
| FF.16 | FF-WWTP | 2,052 | 1,353  | 80,895  | 459  | 150,479 | 43,800  |
| FF.16 | FF-WWTP | 2,092 | 1,434  | 114,474 | 753  | 243,894 | 72,382  |
| FF.16 | FF-WWTP | 2,351 | 1,461  | 78,133  | 472  | 174,509 | 59,429  |
| FF.17 | FF-WWTP | 1,917 | 1,522  | 123,171 | 777  | 237,160 | 65,287  |
| FF.17 | FF-WWTP | 1,698 | 1,178  | 138,300 | 862  | 238,038 | 61,537  |
| FF.17 | FF-WWTP | 1,758 | 1,210  | 103,957 | 578  | 167,757 | 42,114  |
| FF.18 | FF-WWTP | 2,245 | 1,221  | 131,788 | 967  | 264,242 | 81,014  |
| FF.18 | FF-WWTP | 2,161 | 1,237  | 143,036 | 1106 | 285,644 | 85,166  |
| FF.18 | FF-WWTP | 2,060 | 1,146  | 144,395 | 1106 | 274,529 | 78,418  |
| FF.19 | FF-WWTP | 2,066 | 1,884  | 163,994 | 1421 | 328,291 | 90,976  |
| FF.19 | FF-WWTP | 2,123 | 1,881  | 163,551 | 1405 | 320,854 | 92,485  |
| FF.19 | FF-WWTP | 2,238 | 1,698  | 101,527 | 724  | 218,038 | 60,478  |
| FF.20 | FF-WWTP | 2,905 | 1,990  | 132,964 | 990  | 322,360 | 127,107 |
| FF.20 | FF-WWTP | 2,534 | 1,873  | 134,991 | 1004 | 305,849 | 112,897 |
| FF.20 | FF-WWTP | 2,581 | 1,977  | 140,904 | 1135 | 329,717 | 121,067 |
| FF.21 | FF-WWTP | 2,889 | 1,229  | 61,702  | 344  | 134,378 | 59,687  |
| FF.21 | FF-WWTP | 2,704 | 1,587  | 95,511  | 729  | 203,920 | 73,332  |
| FF.21 | FF-WWTP | 2,887 | 1,232  | 62,652  | 354  | 137,590 | 58,296  |
| FF.22 | FF-WWTP | 2,490 | 1,263  | 135,788 | 887  | 219,921 | 83,721  |
| FF.22 | FF-WWTP | 2,416 | 1,370  | 151,786 | 1138 | 279,975 | 100,608 |
| FF.22 | FF-WWTP | 2,662 | 1,455  | 143,368 | 1053 | 297,078 | 114,149 |
| SU.1  | SU-WWTP | 4,111 | -0,096 | 166,161 | 1254 | 493,825 | 219,903 |
| SU.1  | SU-WWTP | 4,078 | 0,137  | 171,170 | 1240 | 507,614 | 228,183 |
| SU.1  | SU-WWTP | 4,867 | 0,039  | 159,971 | 1271 | 546,528 | 262,128 |
| SU.2  | SU-WWTP | 3,112 | -0,219 | 180,279 | 1469 | 498,130 | 151,934 |
| SU.2  | SU-WWTP | 2,853 | -0,019 | 315,419 | 3679 | 742,965 | 190,802 |
| SU.2  | SU-WWTP | 4,165 | 0,351  | 183,042 | 1460 | 565,686 | 215,854 |
| SU.3  | SU-WWTP | 4,063 | -0,870 | 94,026  | 582  | 302,404 | 135,486 |
| SU.3  | SU-WWTP | 4,202 | -0,909 | 111,928 | 716  | 359,346 | 162,555 |
| SU.3  | SU-WWTP | 4,080 | -0,837 | 75,255  | 408  | 238,534 | 126,593 |
| SU.4  | SU-WWTP | 3,489 | 0,947  | 156,368 | 1239 | 538,666 | 217,571 |
| SU.4  | SU-WWTP | 3,362 | 0,884  | 200,357 | 1816 | 649,229 | 236,013 |
| SU.4  | SU-WWTP | 4,049 | 0,940  | 144,110 | 1139 | 520,889 | 222,652 |
| SU.5  | SU-WWTP | 2,871 | -0,747 | 196,046 | 1540 | 547,330 | 151,901 |
| SU.5  | SU-WWTP | 3,849 | -2,798 | 205,352 | 1769 | 750,927 | 235,240 |
| SU.5  | SU-WWTP | 3,639 | -0,199 | 161,345 | 1281 | 479,719 | 155,672 |
| SU.6  | SU-WWTP | 3,768 | 0,339  | 228,565 | 2124 | 613,284 | 194,432 |
| SU.6  | SU-WWTP | 3,789 | 0,562  | 211,127 | 1999 | 638,404 | 218,643 |
| SU.6  | SU-WWTP | 3,645 | 0,533  | 145,140 | 1151 | 434,100 | 167,123 |
| SU.7  | SU-WWTP | 4,541 | 0,515  | 162,600 | 1515 | 507,394 | 194,096 |
| SU.7  | SU-WWTP | 3,487 | -0,050 | 175,839 | 1551 | 493,093 | 168,510 |
| SU.7  | SU-WWTP | 4,440 | 0,368  | 173,965 | 1746 | 479,637 | 156,768 |
| SU.8  | SU-WWTP | 4,193 | 0,339  | 178,535 | 1600 | 537,268 | 200,770 |
| SU.8  | SU-WWTP | 4,109 | 0,421  | 201,663 | 2124 | 622,142 | 221,291 |

|       |         |       |        |         |      |         |         |
|-------|---------|-------|--------|---------|------|---------|---------|
| SU.8  | SU-WWTP | 4,776 | 0,104  | 94,218  | 658  | 320,534 | 159,488 |
| SU.9  | SU-WWTP | 4,684 | 0,376  | 160,835 | 1346 | 600,618 | 275,883 |
| SU.9  | SU-WWTP | 5,384 | 0,885  | 154,965 | 1453 | 630,854 | 285,258 |
| SU.9  | SU-WWTP | 5,709 | 0,506  | 69,870  | 460  | 273,922 | 158,474 |
| SU.10 | SU-WWTP | 4,382 | 0,087  | 168,534 | 1433 | 593,177 | 272,635 |
| SU.10 | SU-WWTP | 4,504 | 0,059  | 179,254 | 1626 | 644,769 | 292,732 |
| SU.10 | SU-WWTP | 3,964 | -0,045 | 174,781 | 1557 | 578,214 | 241,660 |
| SU.11 | SU-WWTP | 4,118 | -0,029 | 65,727  | 356  | 204,550 | 125,206 |
| SU.11 | SU-WWTP | 4,520 | 0,930  | 122,359 | 988  | 421,188 | 202,738 |
| SU.11 | SU-WWTP | 5,535 | 0,789  | 64,616  | 371  | 236,576 | 159,794 |
| SU.12 | SU-WWTP | 6,072 | 0,185  | 116,262 | 859  | 420,845 | 235,538 |
| SU.12 | SU-WWTP | 5,764 | -0,016 | 103,361 | 718  | 372,696 | 214,905 |
| SU.12 | SU-WWTP | 5,905 | 0,025  | 129,333 | 1039 | 476,180 | 251,474 |
| SU.13 | SU-WWTP | 4,946 | 1,133  | 179,568 | 1310 | 538,846 | 203,140 |
| SU.13 | SU-WWTP | 5,316 | 0,037  | 135,075 | 1010 | 455,724 | 225,388 |
| SU.13 | SU-WWTP | 5,956 | 0,394  | 128,319 | 1041 | 481,344 | 251,929 |
| SU.14 | SU-WWTP | 5,862 | 1,271  | 124,590 | 984  | 485,359 | 258,298 |
| SU.14 | SU-WWTP | 5,829 | 1,246  | 141,079 | 1128 | 530,510 | 277,630 |
| SU.14 | SU-WWTP | 5,400 | 1,302  | 147,768 | 1197 | 571,316 | 292,841 |
| SU.15 | SU-WWTP | 5,103 | 0,763  | 146,934 | 1156 | 543,091 | 277,148 |
| SU.15 | SU-WWTP | 5,125 | 0,842  | 149,516 | 1136 | 536,229 | 277,216 |
| SU.15 | SU-WWTP | 5,030 | 0,992  | 141,773 | 1121 | 519,902 | 259,811 |
| SU.17 | SU-WWTP | 3,852 | 0,445  | 125,456 | 875  | 354,914 | 99,179  |
| SU.17 | SU-WWTP | 4,177 | 0,471  | 128,567 | 866  | 357,924 | 115,349 |
| SU.17 | SU-WWTP | 3,660 | 0,534  | 138,168 | 947  | 361,295 | 98,668  |
| SU.18 | SU-WWTP | 3,835 | 0,985  | 117,099 | 779  | 346,518 | 122,458 |
| SU.18 | SU-WWTP | 3,802 | 0,206  | 135,732 | 978  | 368,083 | 93,790  |
| SU.18 | SU-WWTP | 3,775 | 0,212  | 172,529 | 1248 | 434,822 | 115,537 |
| SU.19 | SU-WWTP | 4,645 | 0,662  | 99,308  | 609  | 310,967 | 150,788 |
| SU.19 | SU-WWTP | 4,243 | 0,021  | 100,275 | 604  | 306,169 | 131,803 |
| SU.19 | SU-WWTP | 4,600 | 0,063  | 98,029  | 627  | 314,247 | 138,267 |
| SU.20 | SU-WWTP | 4,240 | 0,265  | 120,333 | 738  | 371,586 | 173,826 |
| SU.20 | SU-WWTP | 4,501 | 0,047  | 117,764 | 746  | 346,818 | 147,218 |
| SU.20 | SU-WWTP | 5,112 | -0,062 | 66,609  | 369  | 195,677 | 92,667  |
| SU.21 | SU-WWTP | 5,027 | 0,648  | 83,179  | 492  | 271,925 | 134,163 |
| SU.21 | SU-WWTP | 4,938 | 0,303  | 83,065  | 471  | 257,431 | 118,326 |
| SU.21 | SU-WWTP | 4,563 | 0,588  | 57,894  | 292  | 185,059 | 101,492 |
| SU.22 | SU-WWTP | 5,029 | 1,437  | 125,420 | 957  | 419,274 | 174,075 |
| SU.22 | SU-WWTP | 5,245 | 1,052  | 78,596  | 450  | 252,847 | 125,708 |
| SU.22 | SU-WWTP | 5,424 | 1,270  | 88,966  | 562  | 292,059 | 137,011 |
| SU.23 | SU-WWTP | 4,939 | 0,742  | 84,170  | 489  | 248,537 | 102,820 |
| SU.23 | SU-WWTP | 4,772 | 1,671  | 149,735 | 1367 | 471,067 | 152,003 |
| SU.23 | SU-WWTP | 4,479 | 1,151  | 155,297 | 1426 | 463,894 | 139,326 |
| SU.24 | SU-WWTP | 4,705 | 0,617  | 76,909  | 426  | 229,224 | 105,161 |
| SU.24 | SU-WWTP | 4,802 | 0,693  | 72,060  | 396  | 216,381 | 98,833  |
| SU.24 | SU-WWTP | 4,616 | 0,562  | 74,007  | 391  | 210,304 | 94,263  |



**SUPPLEMENTARY DATA 1.** Bray-Curtis dissimilarity matrix and probability of co-occurrence values for FF-WWTP and SU-WWTP (see separate file).

**SUPPLEMENTARY DATA 2.** Detailed information about sample characteristics, operational and environmental parameters, and time-point network properties (see separate file).

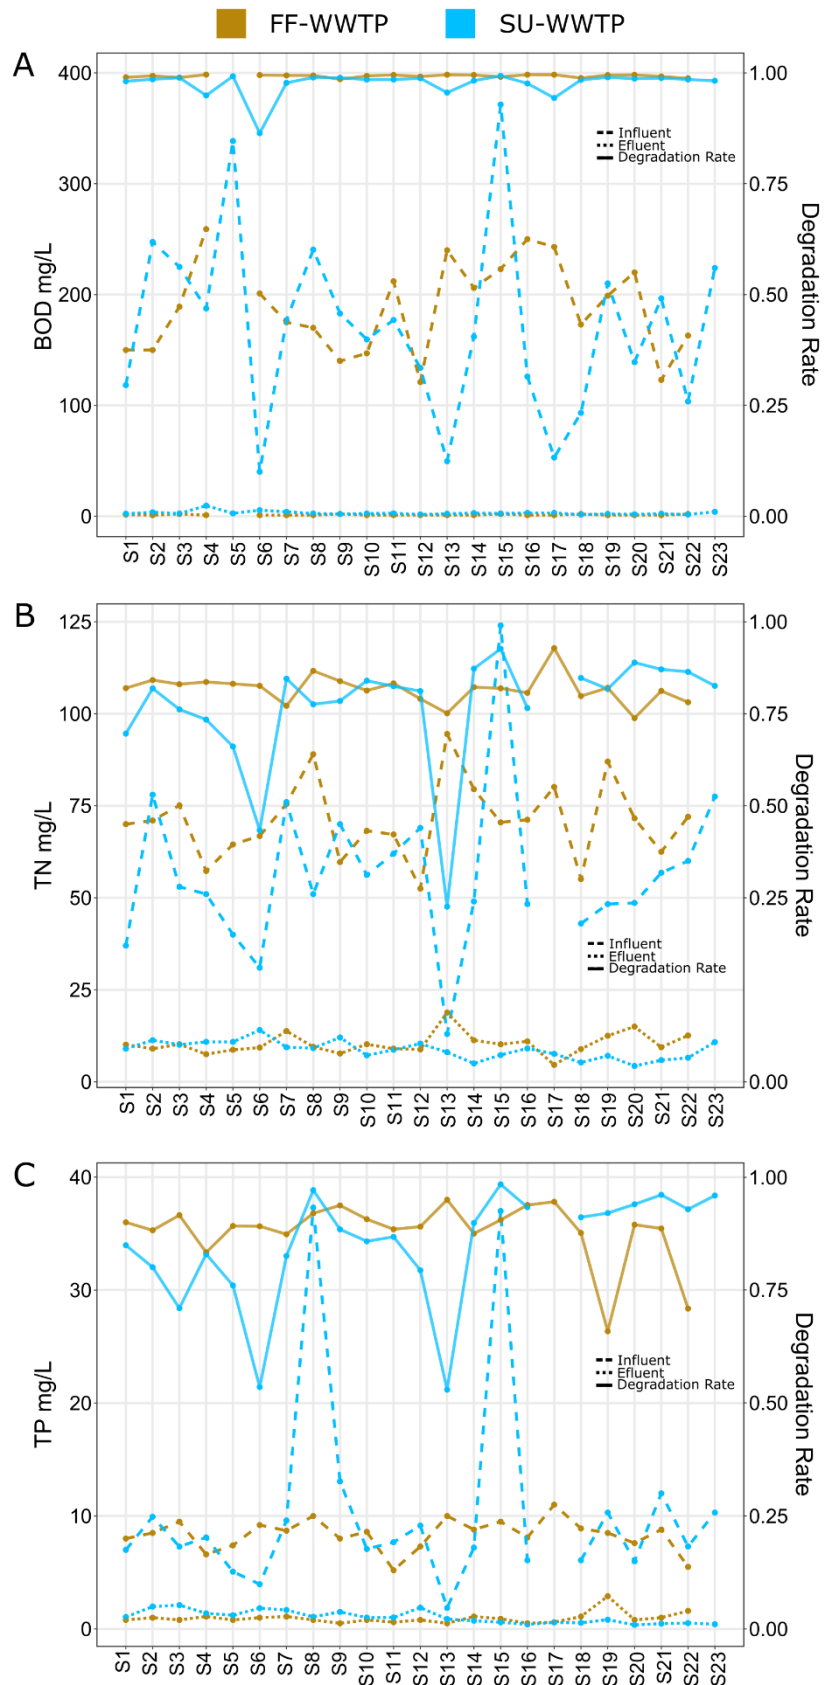

**Supplementary Figure 1. Pollutant load.** A) Biological oxygen demand. B) Total nitrogen. C) Total phosphorous. Smooth lines represent degradation rates, dashed lines concentrations at the influent and dotted lines concentrations at the effluent.

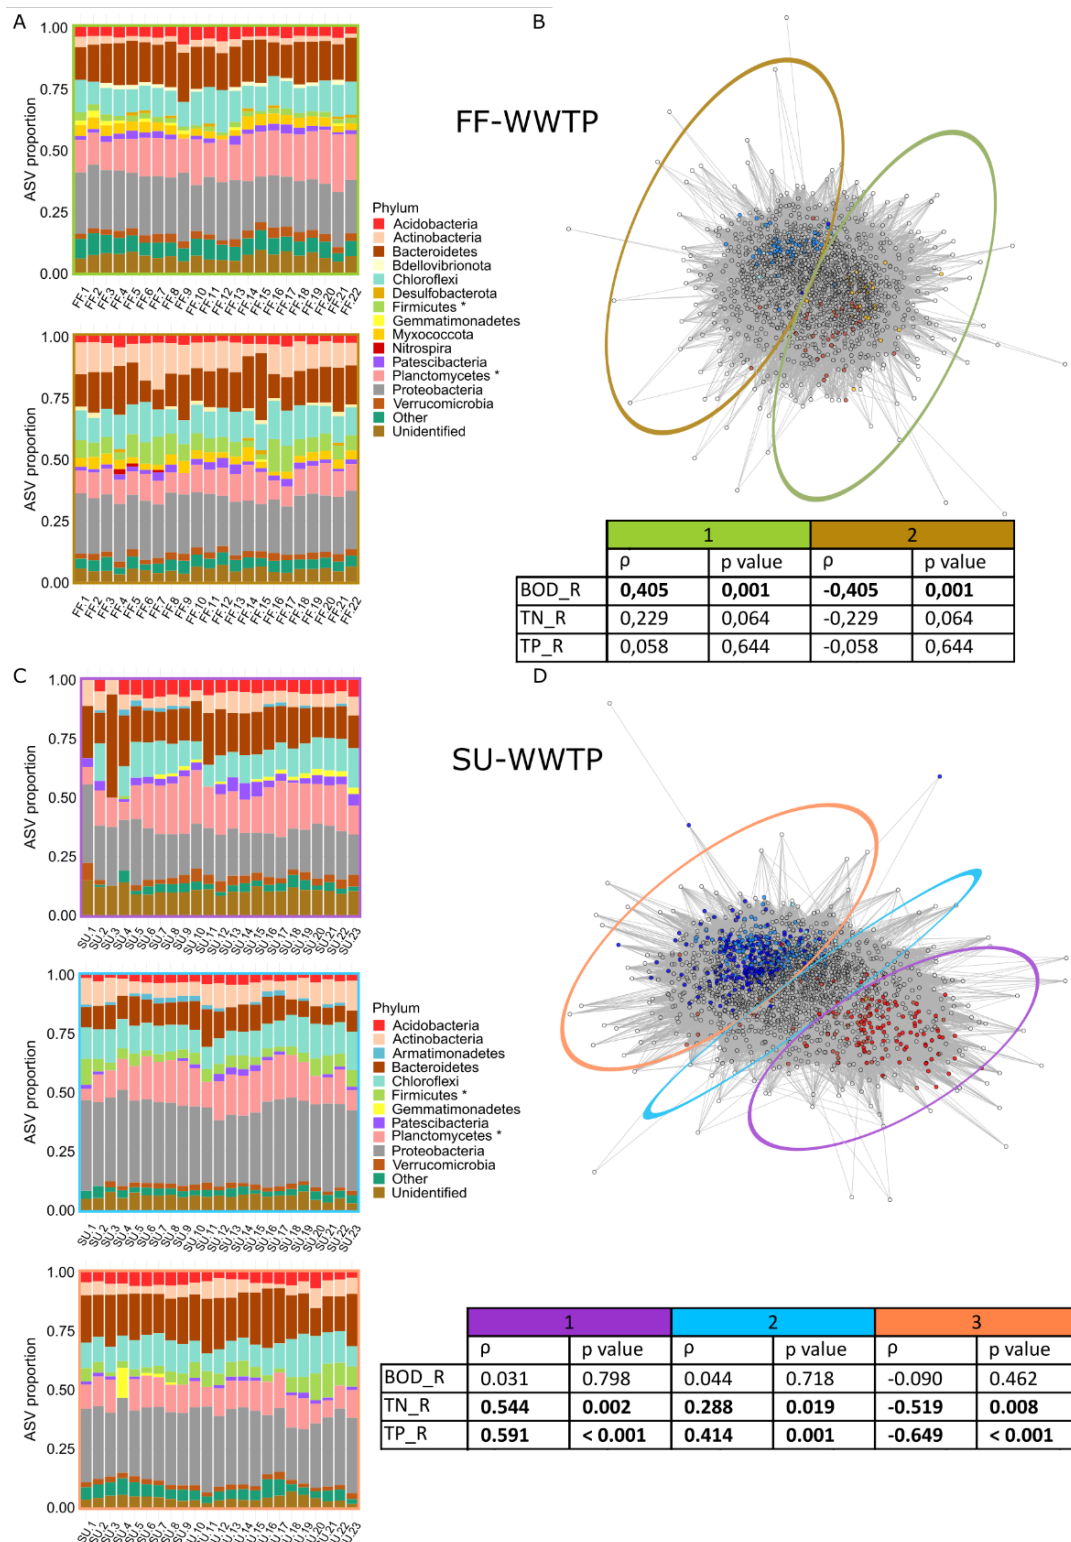

**Supplementary Figure 2. Taxonomic profiling at the phylum level of modules present in activated sludge communities.** A) Modules present in FF-WWTP. B) FF-WWTP metaweb where nodes are colored by their main correlating pollutant degradation rate. C) Modules present in SU-WWTP. D) SU-WWTP metaweb where nodes are colored by their main correlating pollutant degradation rate. Firmicutes and Planctomycetes had significant differences in abundance in the different modules of the same WWTP (Student's t-test,  $p < 0.05$ ). Tables represent the Spearman's rank correlations between module completeness and the pollutant degradation rates.

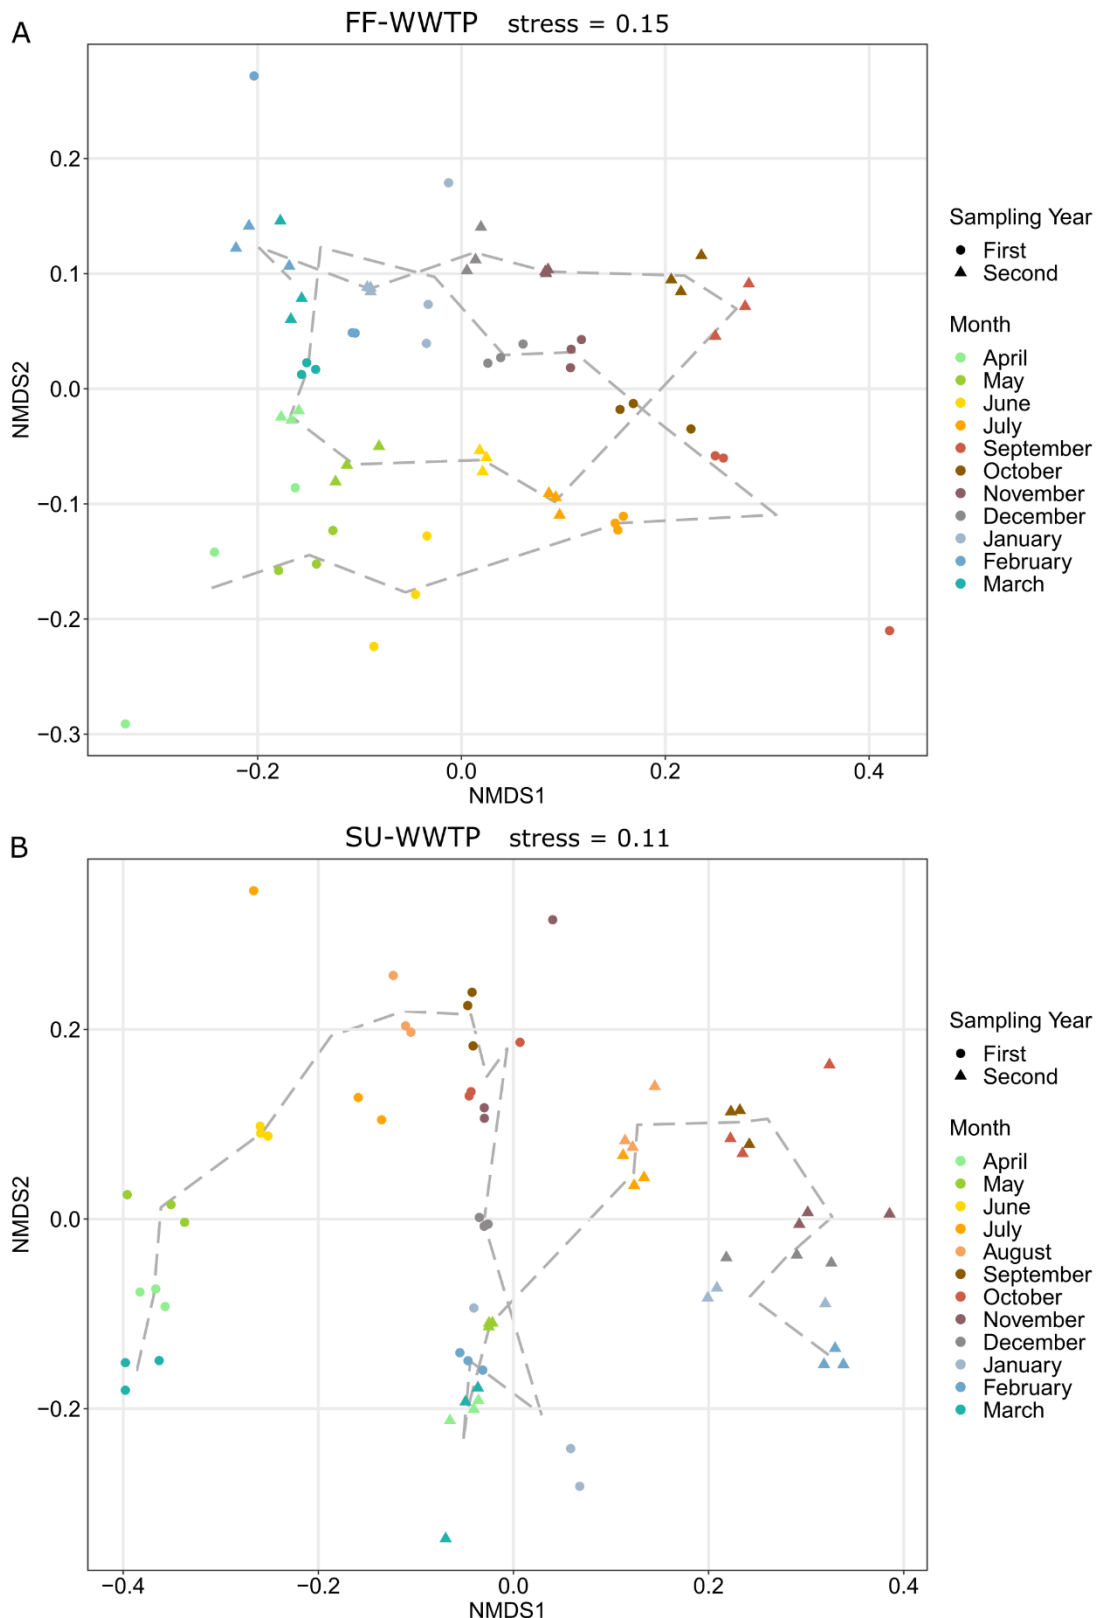

**Supplementary Figure 3. Beta diversity ordinations of FF-WWTP and SU-WWTP microbial communities.** Non-metric multidimensional scaling (nmDS) calculated from Bray-Curtis dissimilarity matrices of ASV abundance data A) FF-WWTP and B) SU-WWTP. Dashed line shows the temporal succession of samples, showing the temporal dynamics of the microbial community.

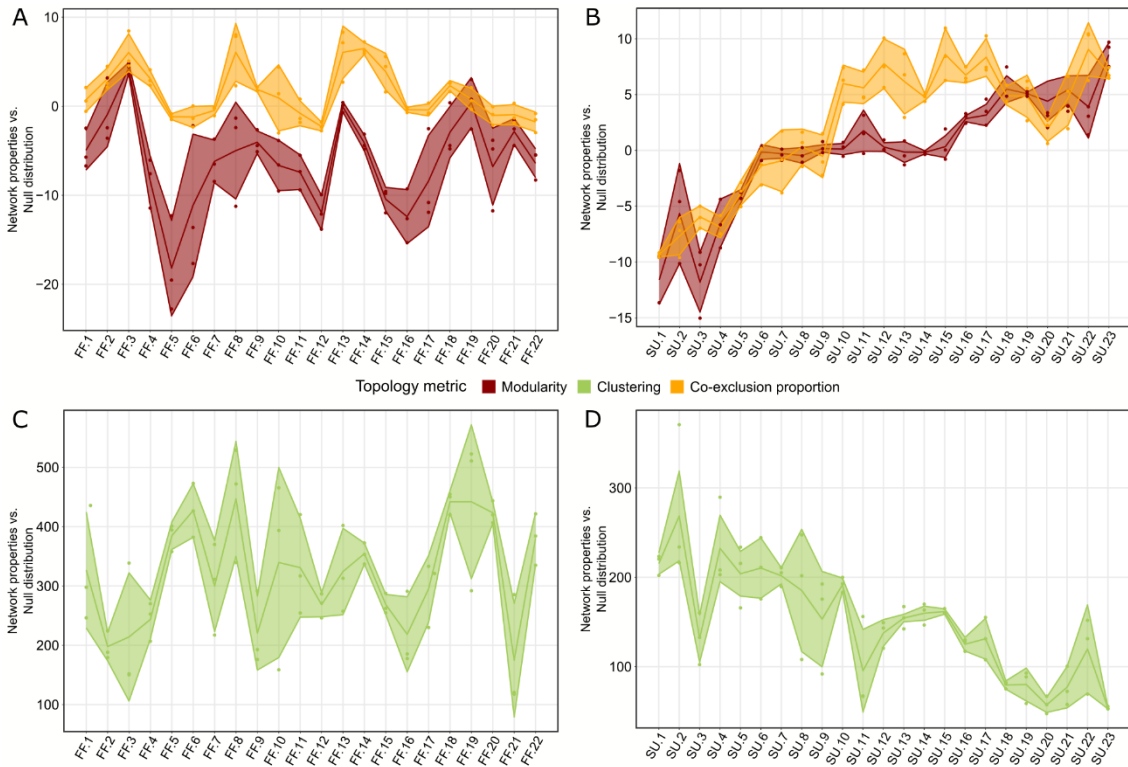

**Supplementary Figure 4. Observed time-point network properties compared to null distributions.** Modularity and co-exclusion proportion **A)** in the FF-WWTP **B)** and SU-WWTP. Clustering coefficient **C)** in the FF-WWTP **D)** and SU-WWTP. Dots represent sample data ( $n = 3$ ), the central lines correspond to average values of each sample, and the shaded areas correspond to the standard deviation.

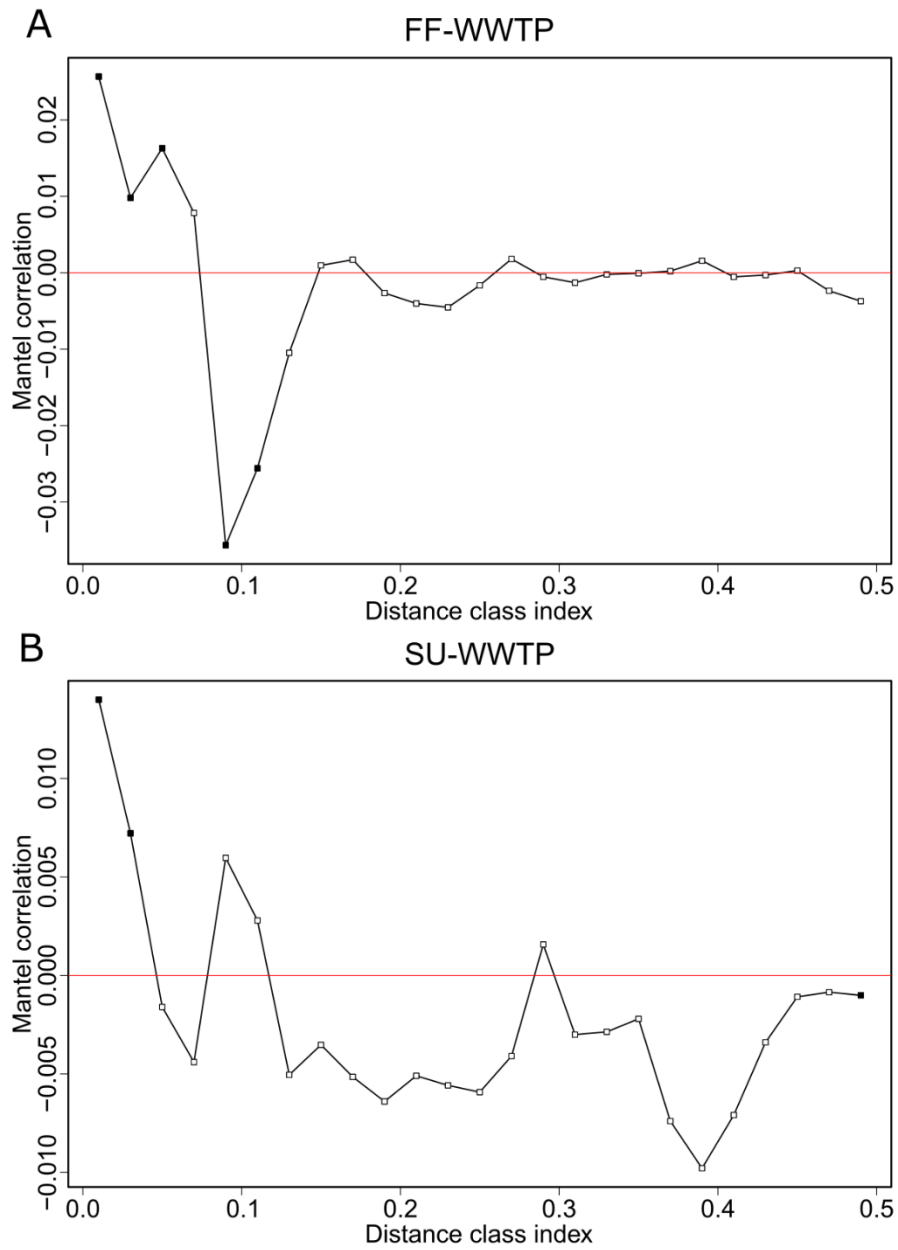

**Supplementary Figure 5. Mantel correlograms showing phylogenetic signal.** Pearson correlation resulting from Mantel correlogram (999 permutations) between the ASV niche and phylogenetic distances for A) FF-WWTP and B) SU-WWTP. Significant correlations ( $p$  value  $< 0.05$ , solid squares) indicate phylogenetic signal in species ecological niches.

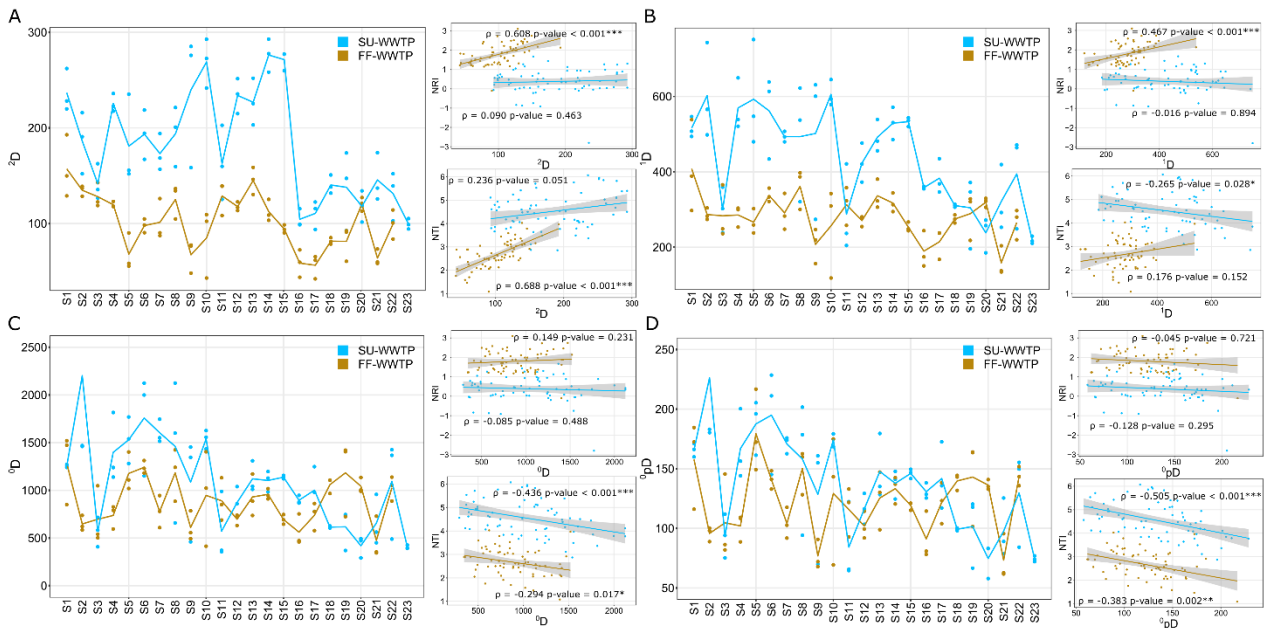

**Supplementary Figure 6. Indices of  $\alpha$ -diversity and community phylogenetic dispersion against the null expectation.** Hill based taxonomic  $\alpha$ -diversity accounting for **A)** inverse of dominance, **B)** abundance and **C)** richness, and **D)** phylogenetic  $\alpha$ -diversity of diversity order = 0. The left panels correspond with the Spearman's rank correlation between NRI and NTI phylogenetic dispersion metrics and  $\alpha$ -diversity metrics. Dots represent sample data ( $n = 3$ ), and lines represent the average value per time point. Blue points and lines represent SU-WWTP, and brown represent FF-WWTP.
